# Supplementary material
Source: PubMed Central journal article supplement (PMC10355909)

# Estrogen Receptor- $\beta$ Modulation of the ER $\alpha$ -p53 Loop Regulating Gene Expression, Proliferation and Apoptosis in Breast Cancer

Wenwen Lu<sup>1</sup>, and Benita S. Katzenellenbogen<sup>1</sup>

<sup>1</sup>Department of Molecular and Integrative Physiology, University of Illinois at Urbana-Champaign, Urbana IL 61801, USA

**\*To whom correspondence should be addressed:**

Dr. Benita S. Katzenellenbogen  
University of Illinois  
Department of Molecular and Integrative Physiology  
524 Burrill Hall, 407 South Goodwin Avenue  
Urbana, IL 61801-3704  
Phone: 217-333-9769  
E-mail: [katzenel@illinois.edu](mailto:katzenel@illinois.edu)

**Journal: Hormones and Cancer**

## SUPPLEMENTARY FIGURE LEGENDS

**Fig. S1 Analysis of p53 mRNA and protein levels.** (A) Marked reduction of p53 mRNA in MCF-7 cells transfected with p53 siRNA. Cells were incubated with 20 nM p53 siRNA for 72 h and p53 mRNA was then monitored by qRT-PCR. (B) Western blots show the reduced level of p53 in p53 knockdown MCF-7 cells.  $\beta$ -actin is used as loading control. (C) qRT-PCR analysis of the p53 mRNA levels in MCF-7 cells ( $p53^{+/+}$ ) and MDA-MB-157 cells ( $p53^{-/-}$ ). (D) Western blot analysis of the p53 protein levels in MCF-7 cells ( $p53^{+/+}$ ) and MDA-MB-157 cells ( $p53^{-/-}$ ).

**Fig. S2 Knockdown of ER $\alpha$  enhanced ER $\beta$ -mediated transcriptional activation.** (A) MCF-7 cells were transfected with 20 nM ER $\alpha$  siRNA for 72 h. qRT-PCR analysis of the mRNA levels of ER $\alpha$ -repressed genes in ER $\alpha$  cells and ER $\alpha$ +ER $\beta$  cells. \*,  $P < 0.05$ ; \*\*,  $P < 0.01$ . (B) Analysis of the mRNA and protein levels of ER $\alpha$  in MCF-7 cells transfected with ER $\alpha$  siRNA.

# Figure S1

**A**

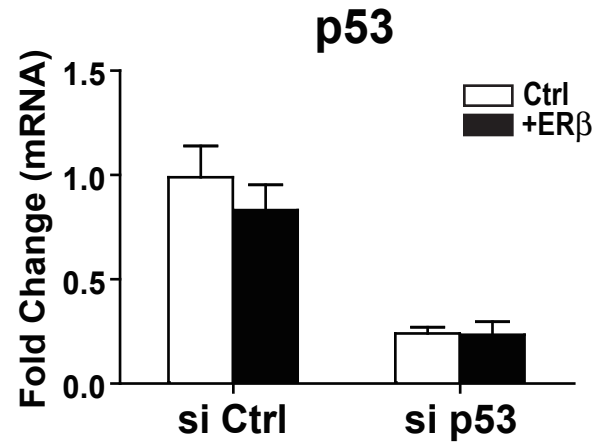

**B**

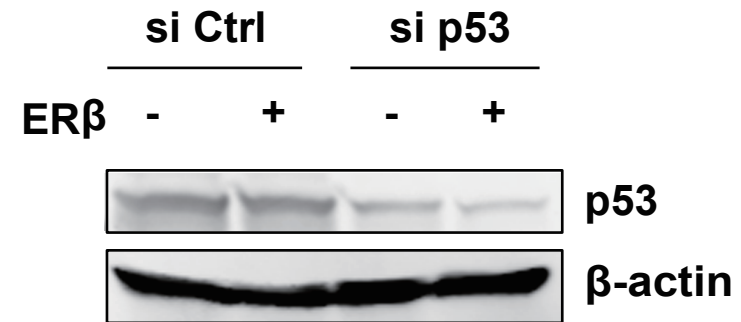

**C**

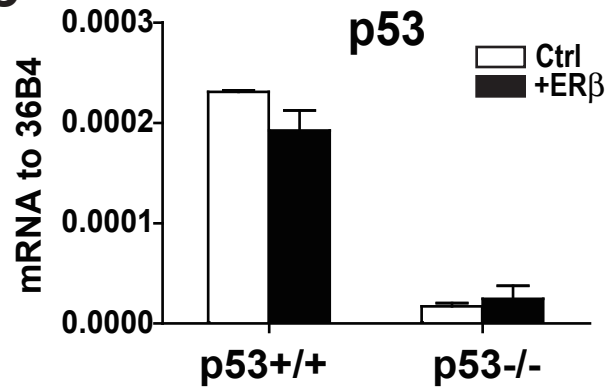

**D**

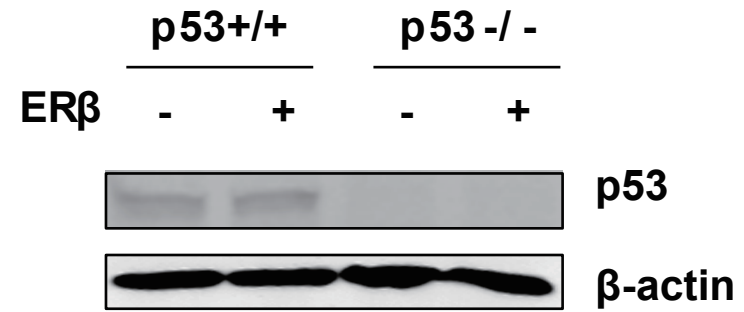

# Figure S2

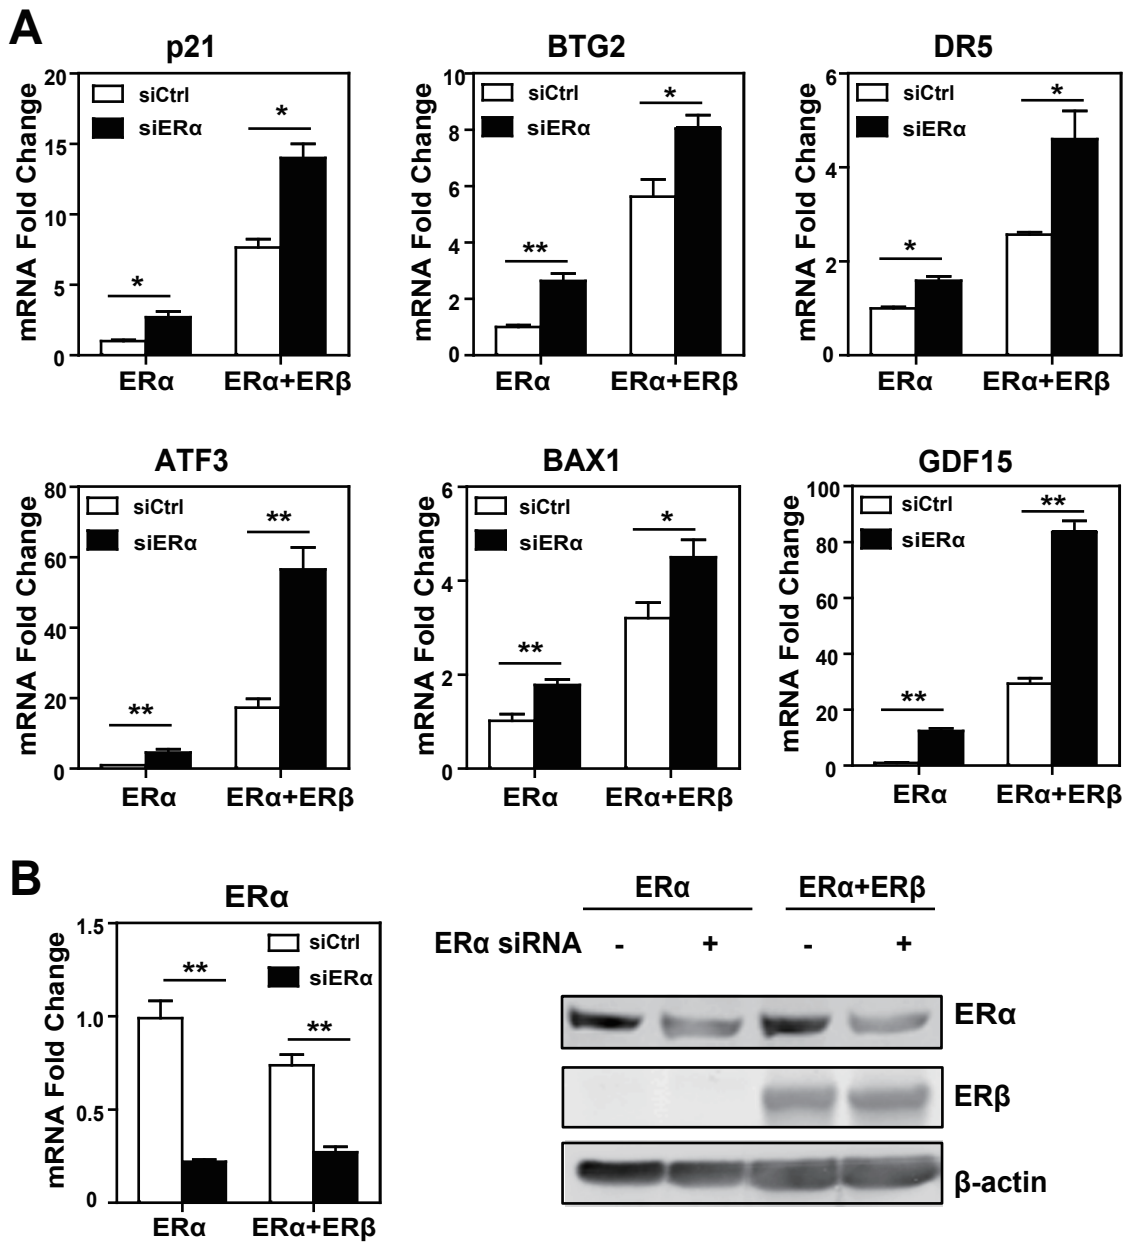

Supplement: 12672_2017_298_MOESM1_ESM.pdf [file 12672_2017_298_MOESM1_ESM.pdf]
